# Supplementary material
Source: publisher figshare collection journal article supplement (https://diabetesjournals.figshare.com/articles/dataset/_/19193105)

**Figure S1. Proteins that are significantly altered by remodeling gut microbiota**

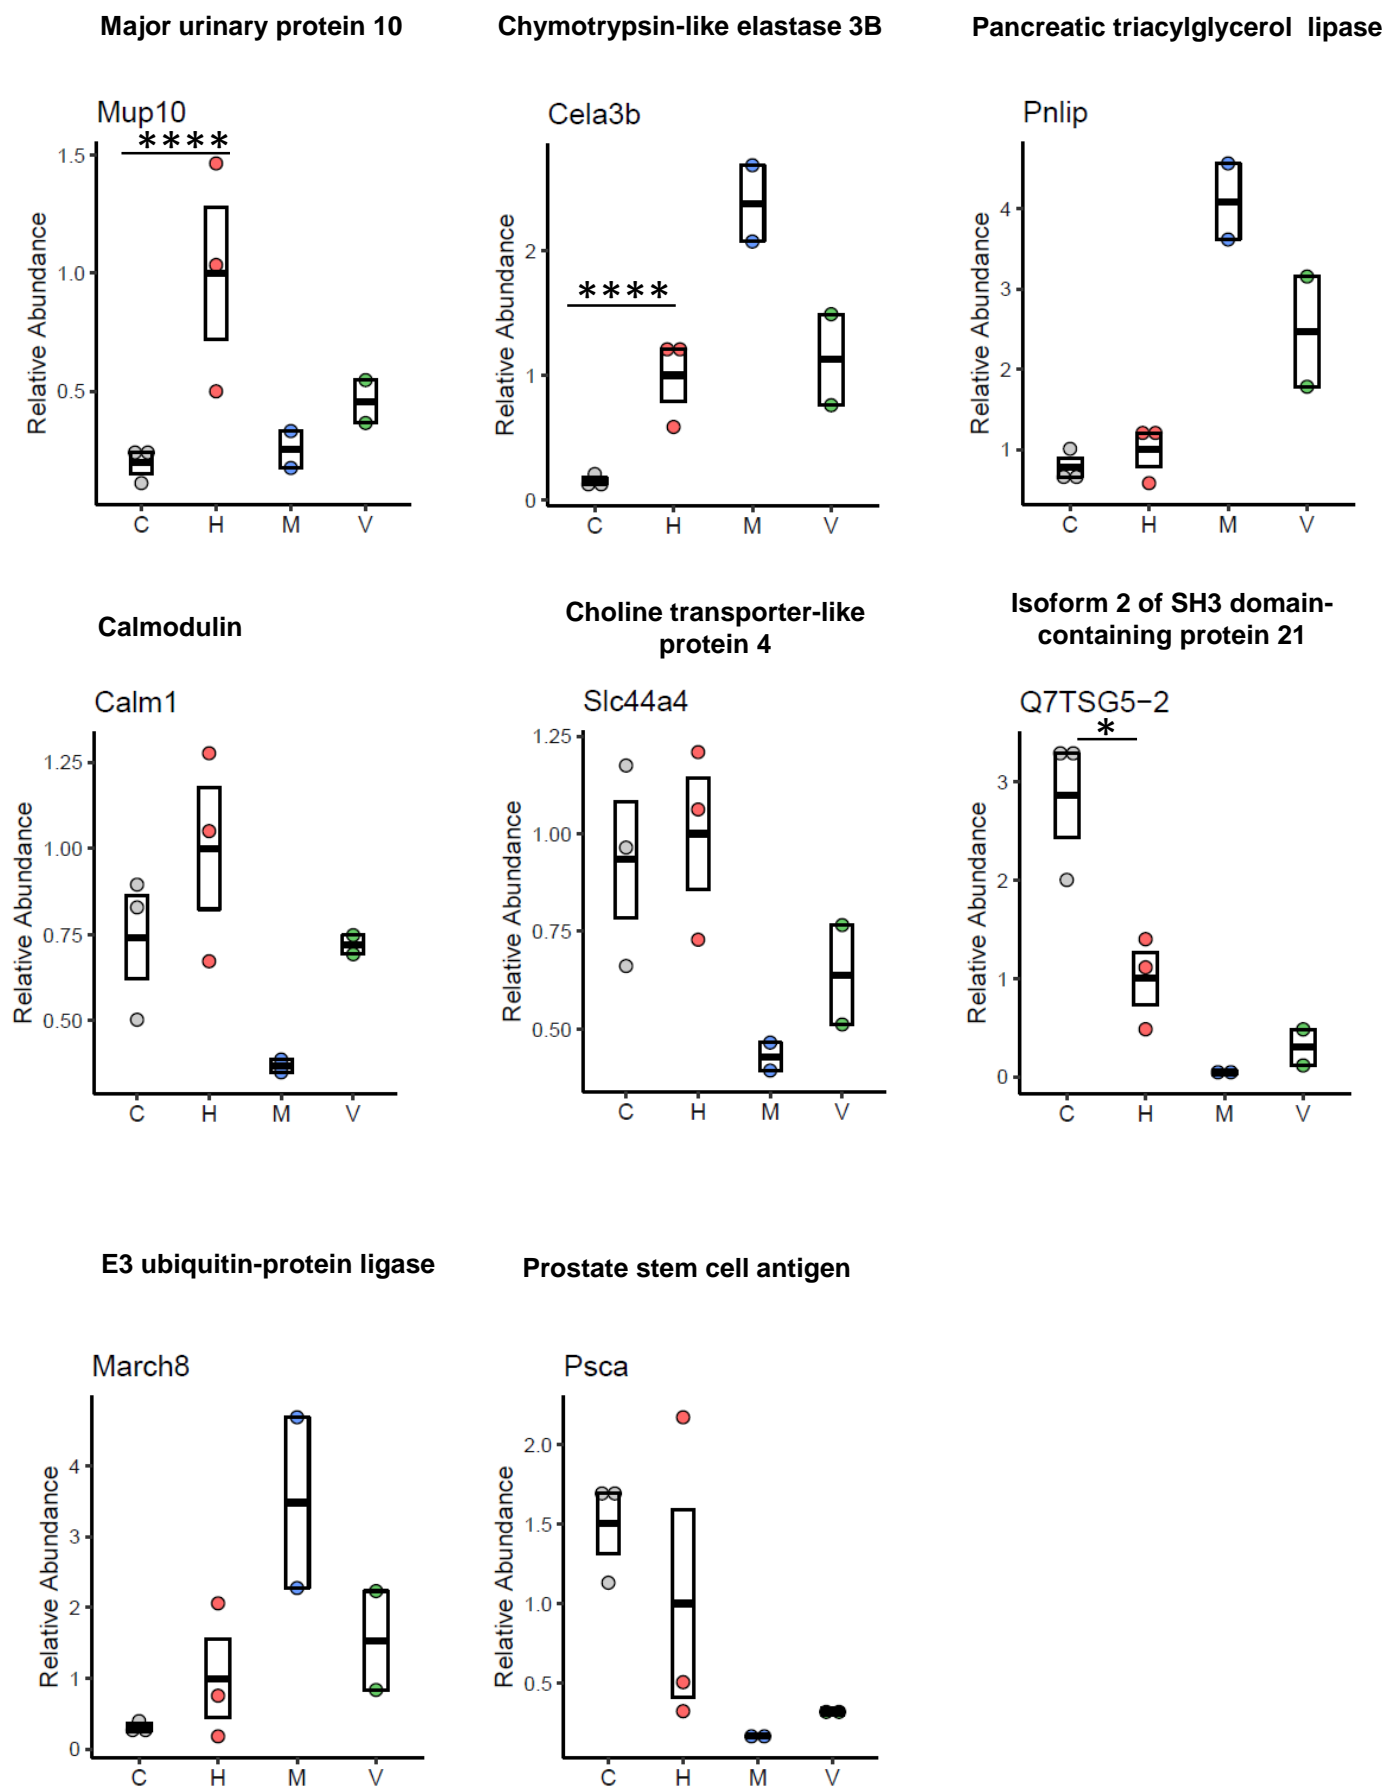

**Figure S2.**

**A.**

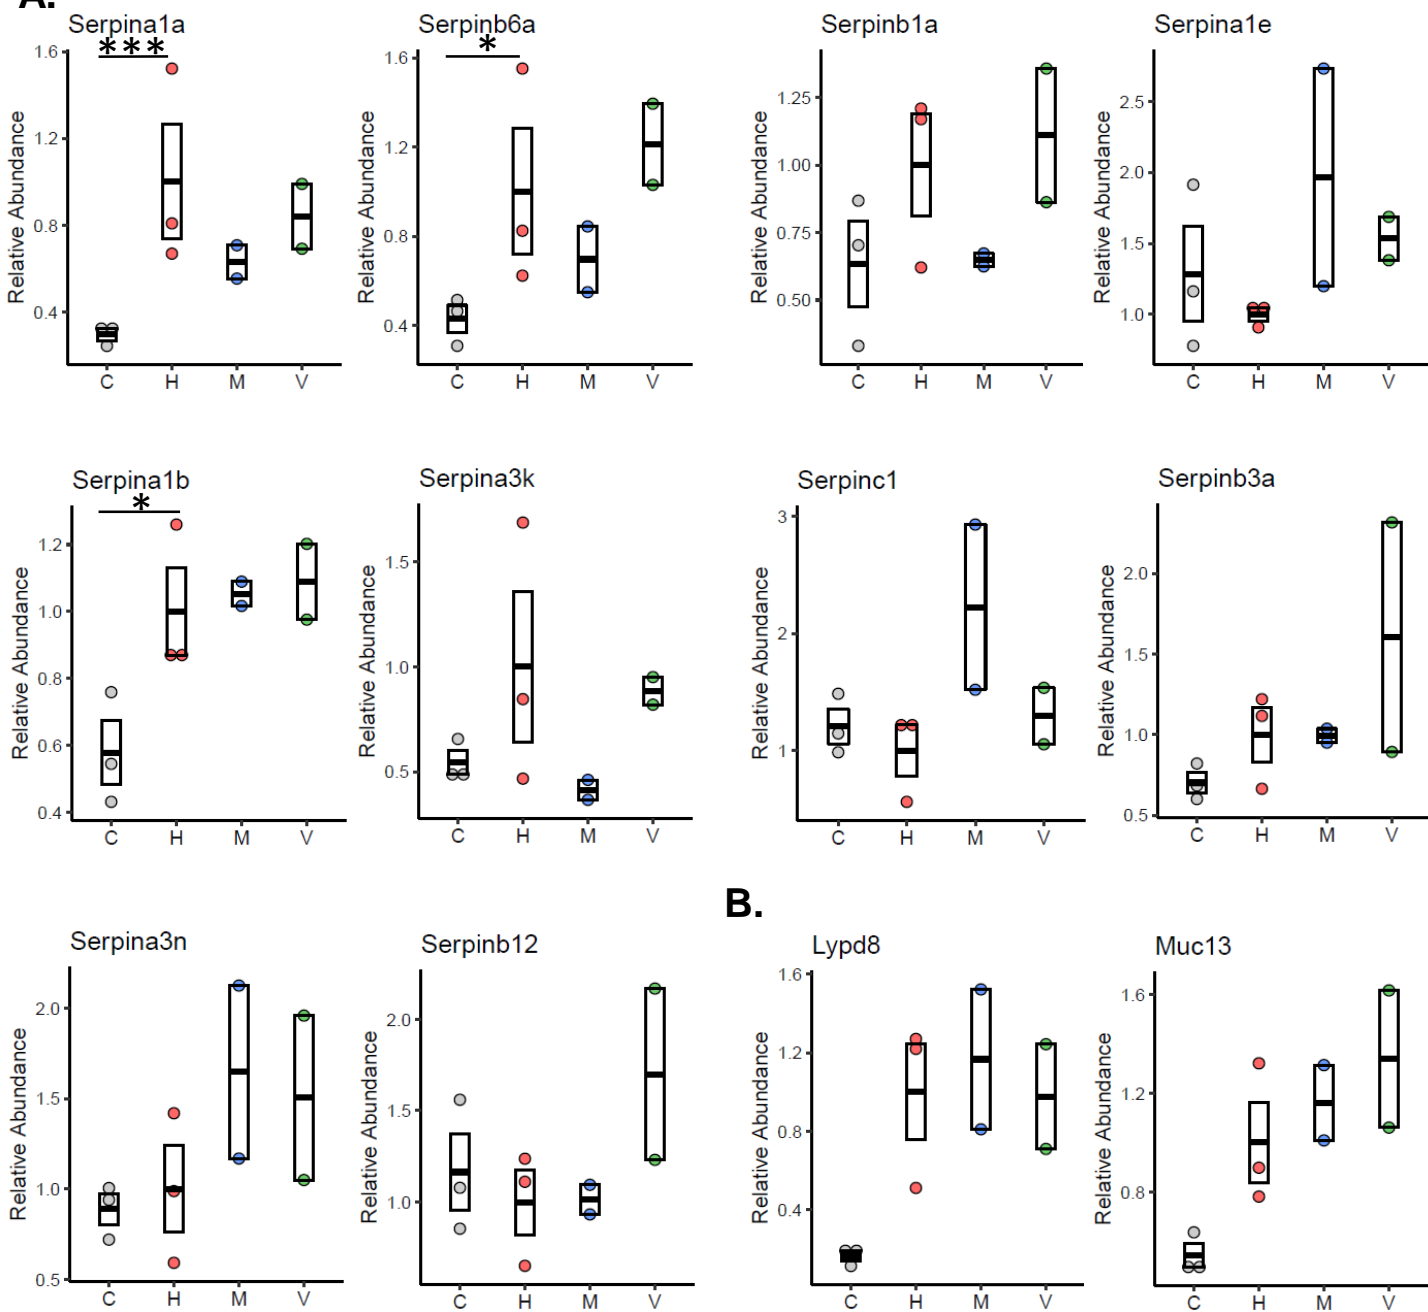

**B.**

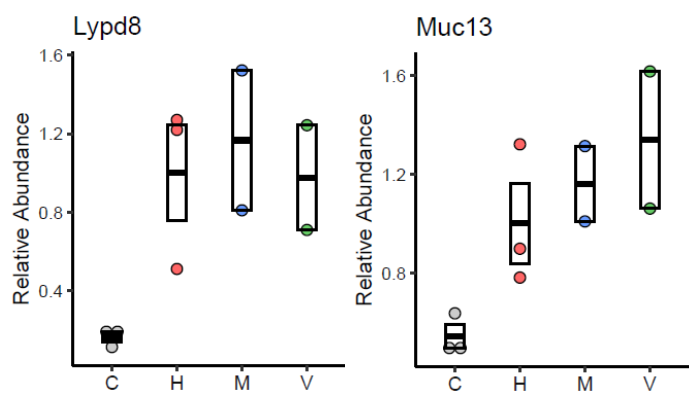

**Figure S3.**

**A.**

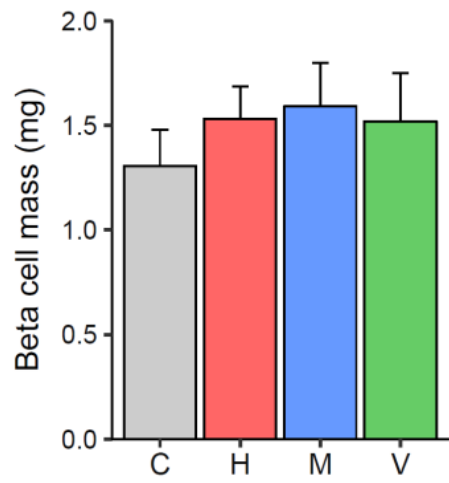

**B.**

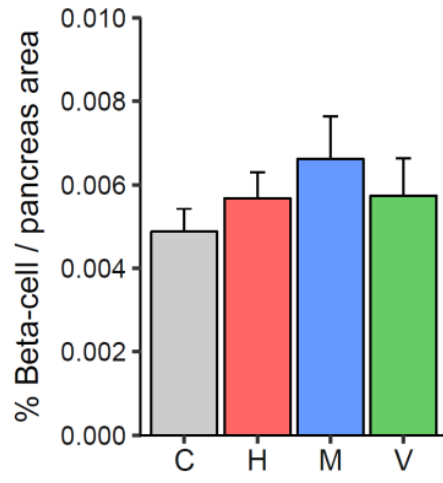

**Figure S4. There is no difference in acinar cell proliferation in the donor mice (BrdU staining).**

**A. Chow**

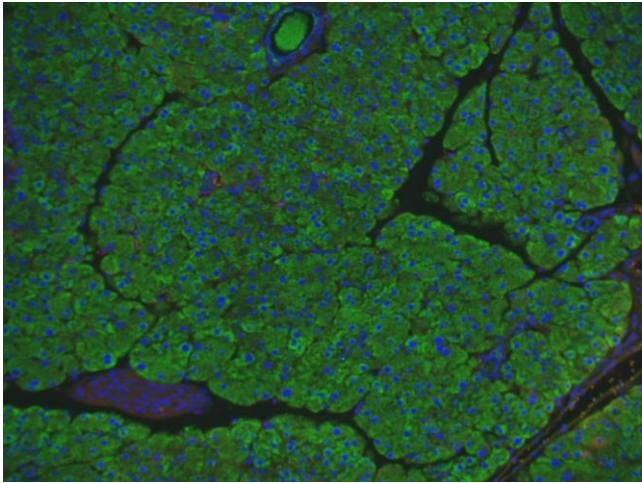

**B. HFD**

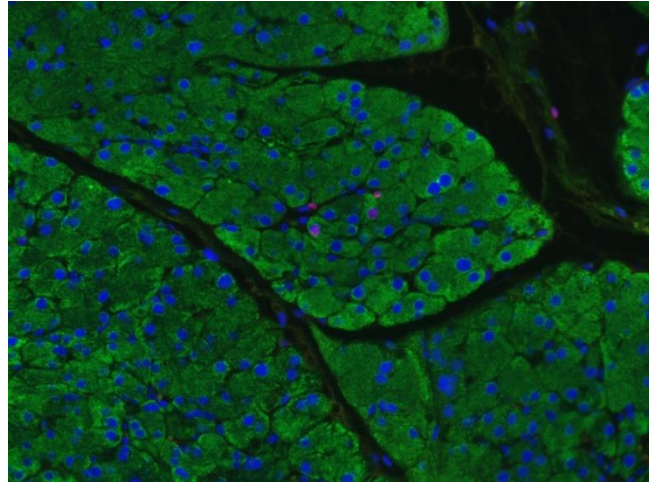

**C. HFD+V**

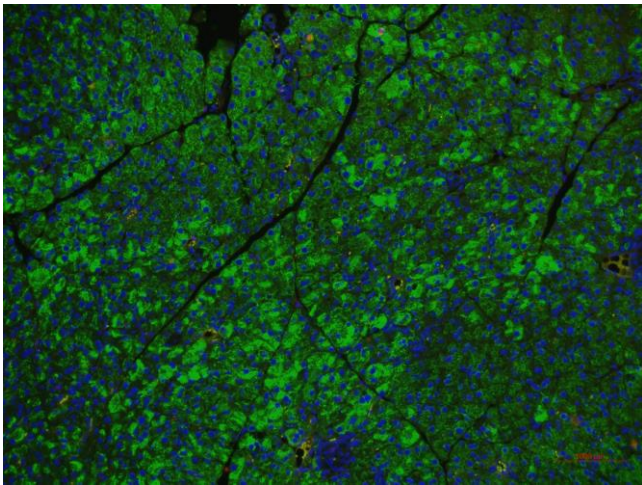

**D. HFD+M**

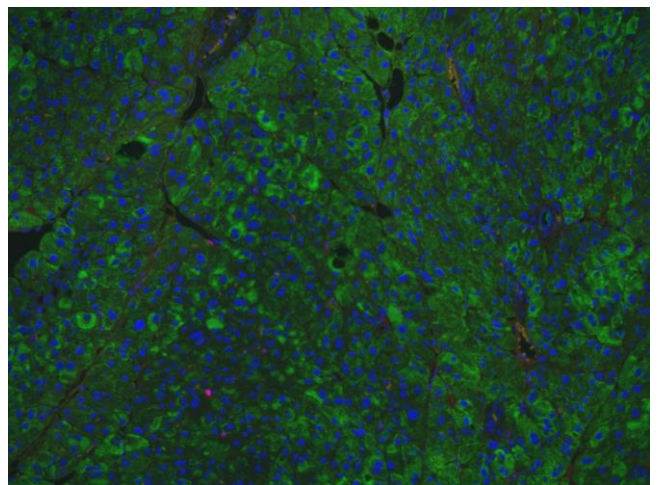



**Figure S5. There is no difference in acinar cell proliferation in the donor mice (Ki67 staining).**

**A. Chow**

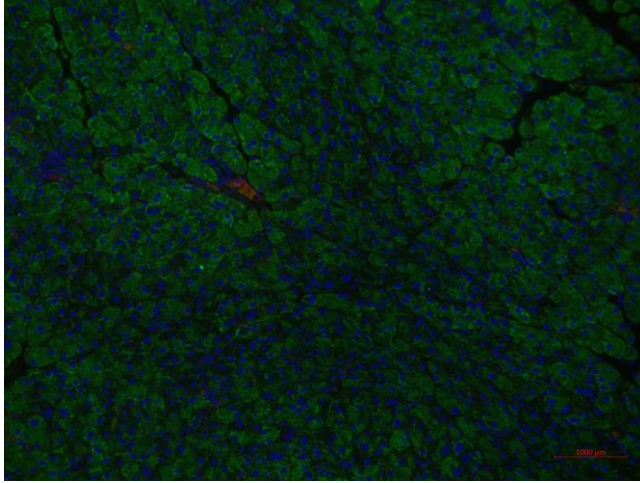

**B. HFD**

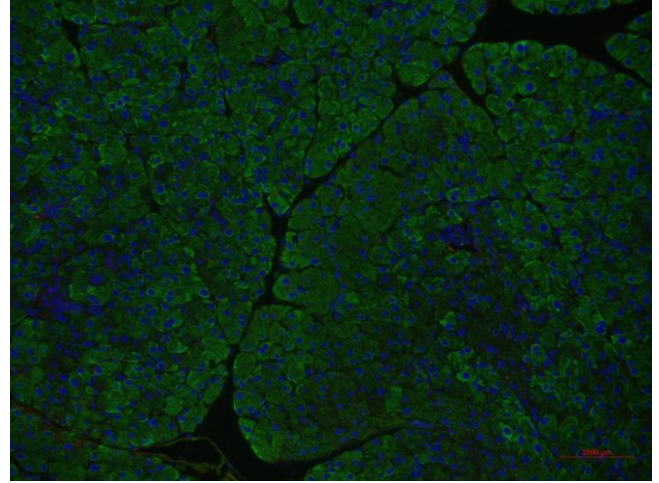

**C. HFD+V**

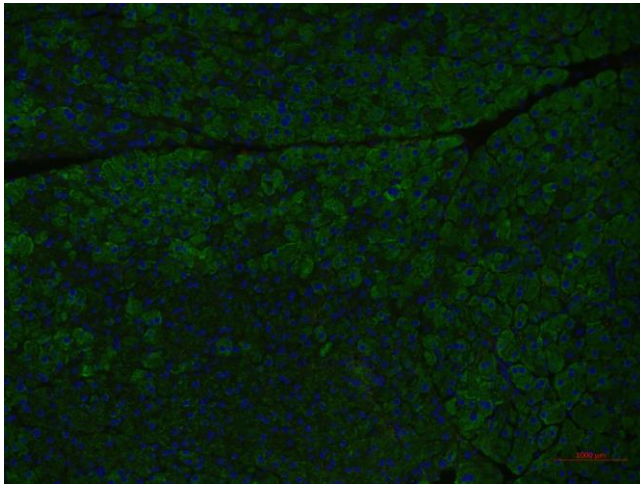

**D. HFD+M**

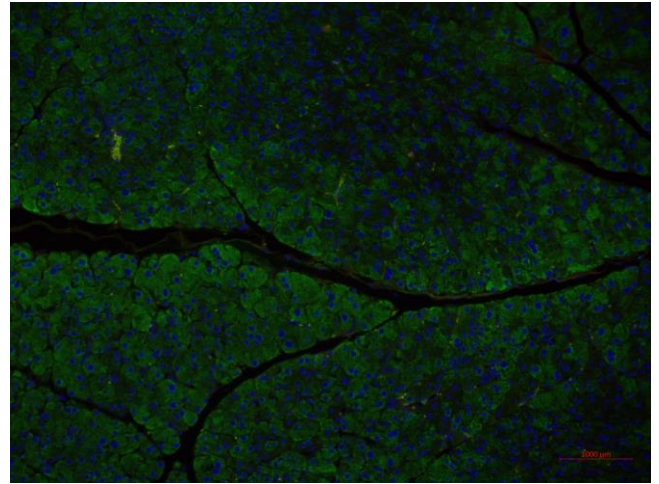

**E.**

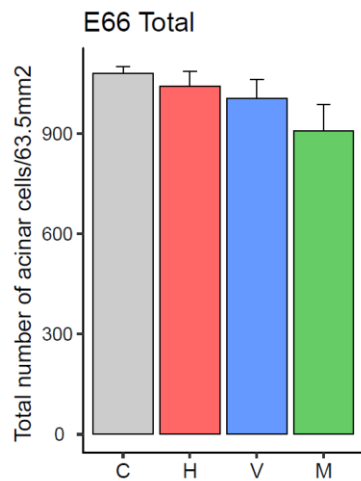

**F.**

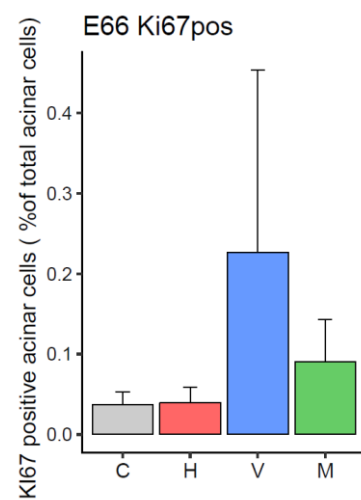

**Figure S6. There is no difference in acinar cell proliferation in the germ free mice two weeks after the gut microbiota transfer (Ki67 staining).**

**A. Chow**

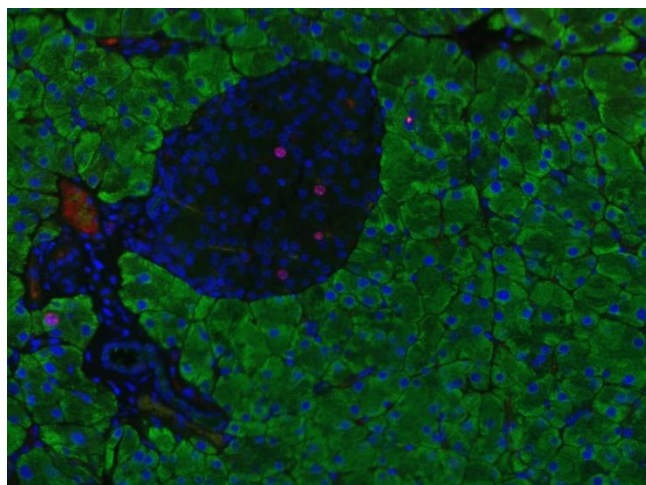

**B. HFD**

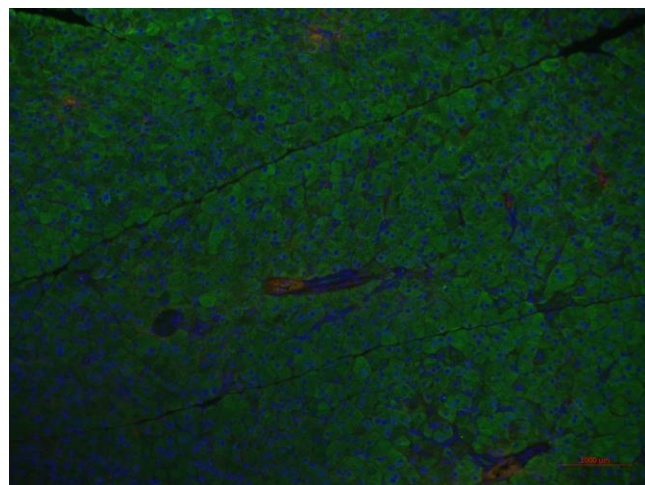

**C. HFD+V**

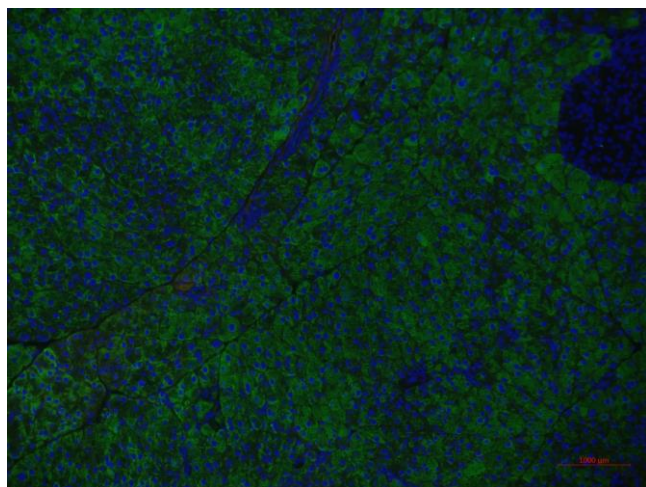

**D. HFD+M**

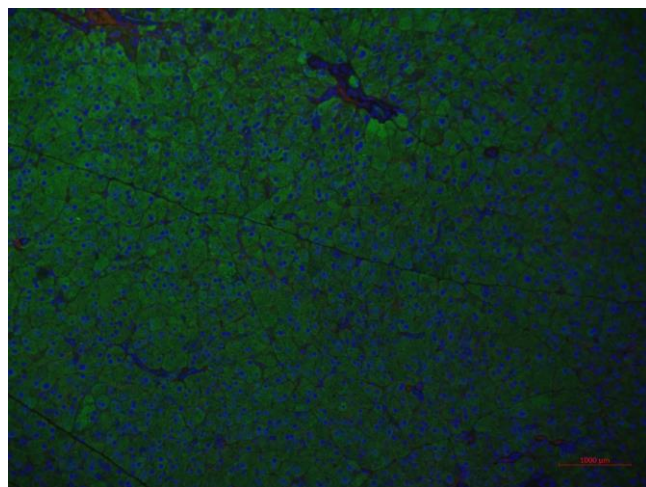

**Figure S7. Diet and microbiome alters intestinal and pancreatic hormone secretion**

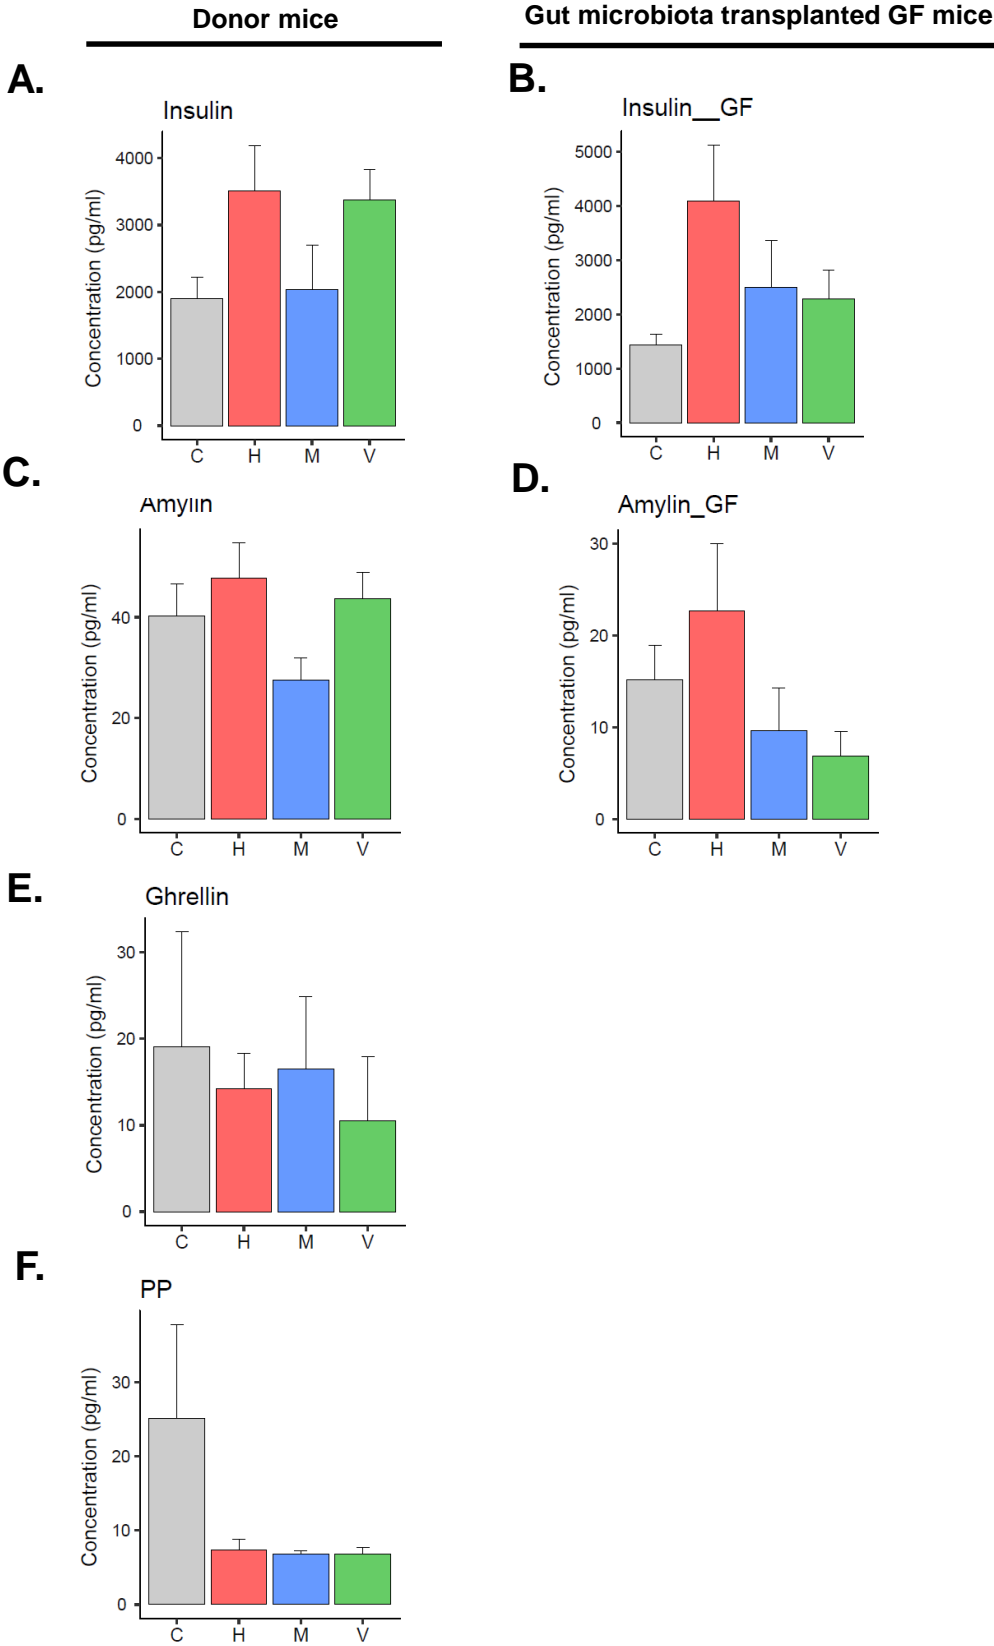

Figure S8 Diet and gut microbiome alter adipose and cecum weight

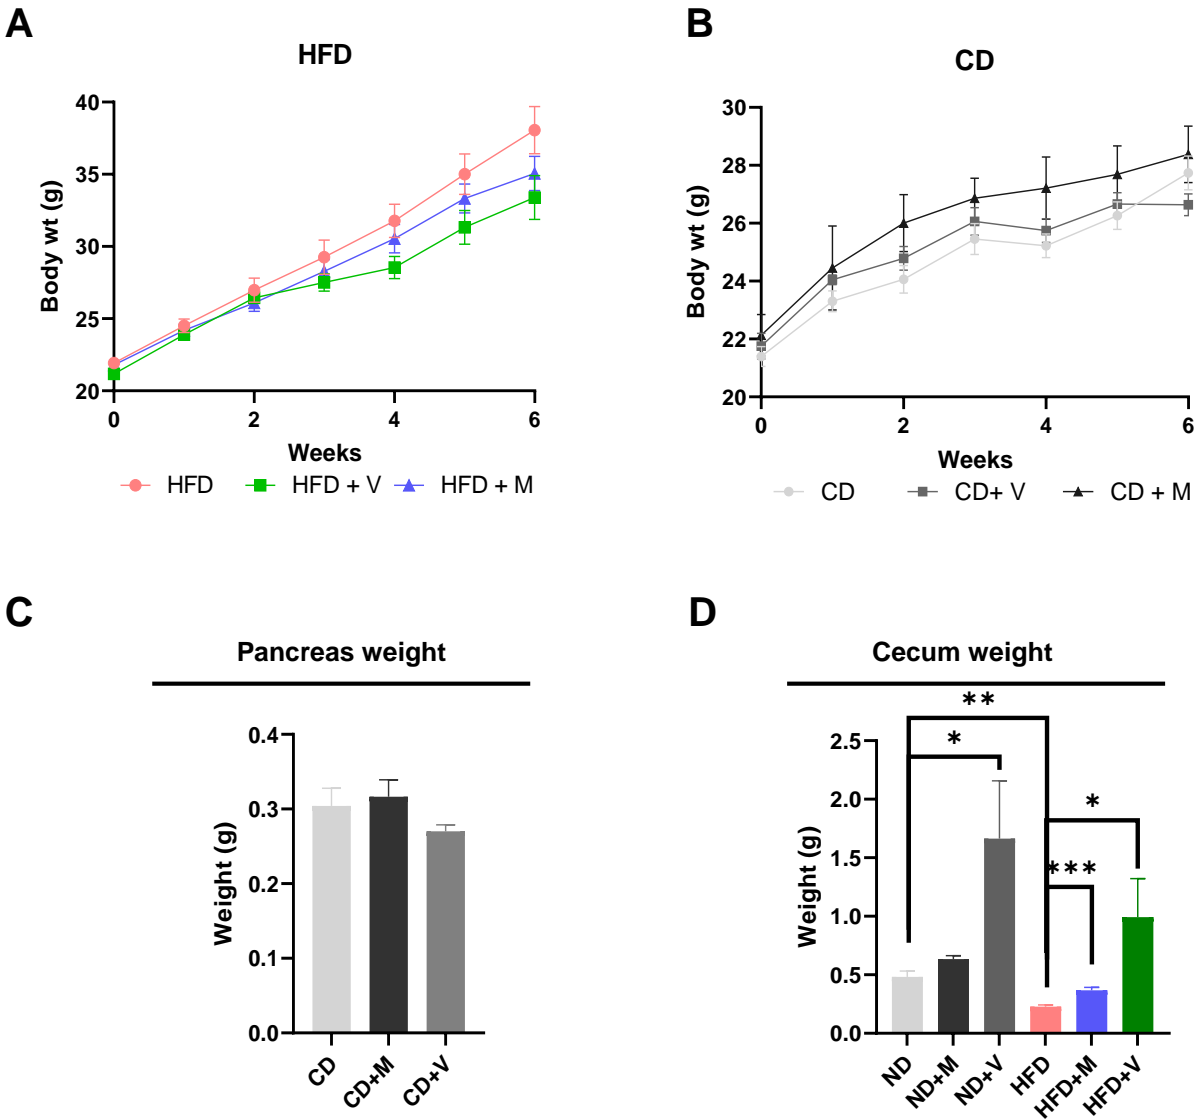

Supplement: Supplementary file 2 [file 2]
